# Supplementary material
Source: PubMed Central journal article supplement (PMC9585151)
Supplement: NIHMS1791926-supplement-Supplemental_digital_content_5.pdf [file NIHMS1791926-supplement-Supplemental_digital_content_5.pdf]

Supplemental Digital Content 5: Calibration Plot for Model 3

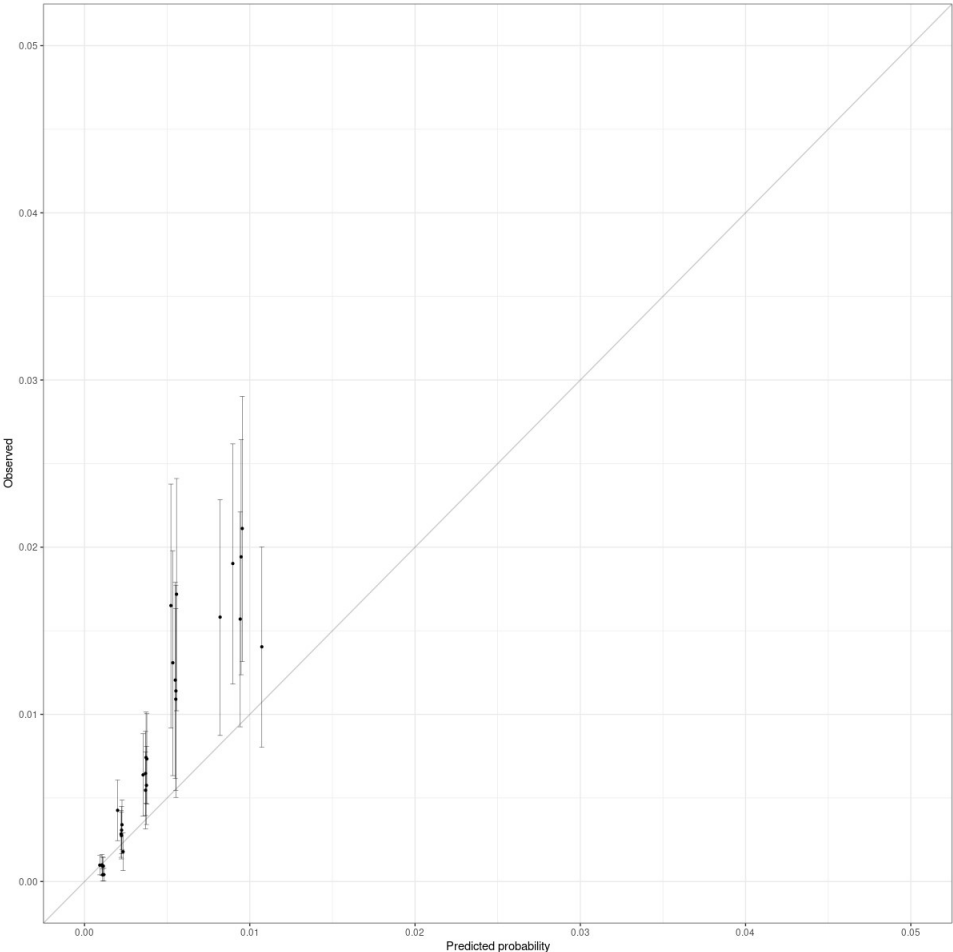

eFig 1. Calibration plot for Model 3. The five clusters represent the five risk groups defined by the ranges of predicted risks: <50th, 50–74th, 75–90th, 90–94th, 95–100th percentiles. Within each cluster, there are 6 dots representing six pairs of predicted and observed risks, calculated from 6 validation datasets.
