# Supplementary material
Source: PubMed Central journal article supplement (PMC9585151)
Supplement: NIHMS1791926-supplement-Supplementary_digital_content_6.pdf [file NIHMS1791926-supplement-Supplementary_digital_content_6.pdf]

## Supplemental Digital Contents 6: Case example

A 70 (75) year old patient with a hemoglobin A1c value increase of 0.5% (1.0%) percentage points with 200 days between measurements and thus change rate per day of 0.0025 (0.005) with no prior history of diabetes and drop of 4 lbs (8 lbs) in weight in the past year.

```
rf.obj <- readRDS(here("current_26JUN2020", "data", "rf.obj.untrans.model1.imp1train5.RDS"))
```

```
new_patients <- data.frame(  
  ageatindex = c(70, 75),  
  wtchange = c(-4, -8),  
  a1cchangerateperday = c(0.0025,0.005),  
  a1cchange = c(0.5, 1.0)  
)
```

```
prediction <- predict(rf.obj, new_patients)  
risk.3year <- 1-prediction$survival[,length(prediction$time.interest)]
```

```
risk.3year
```

```
## [1] 0.004148707 0.008985571
```

The 3-year risk of PDAC for these patients is 0.4% and 0.9%, respectively.
