# Supplementary material
Source: PubMed Central journal article supplement (PMC9585151)

# Supplemental Digital Content 7: Decision rules based on one of the trees built for Model 1

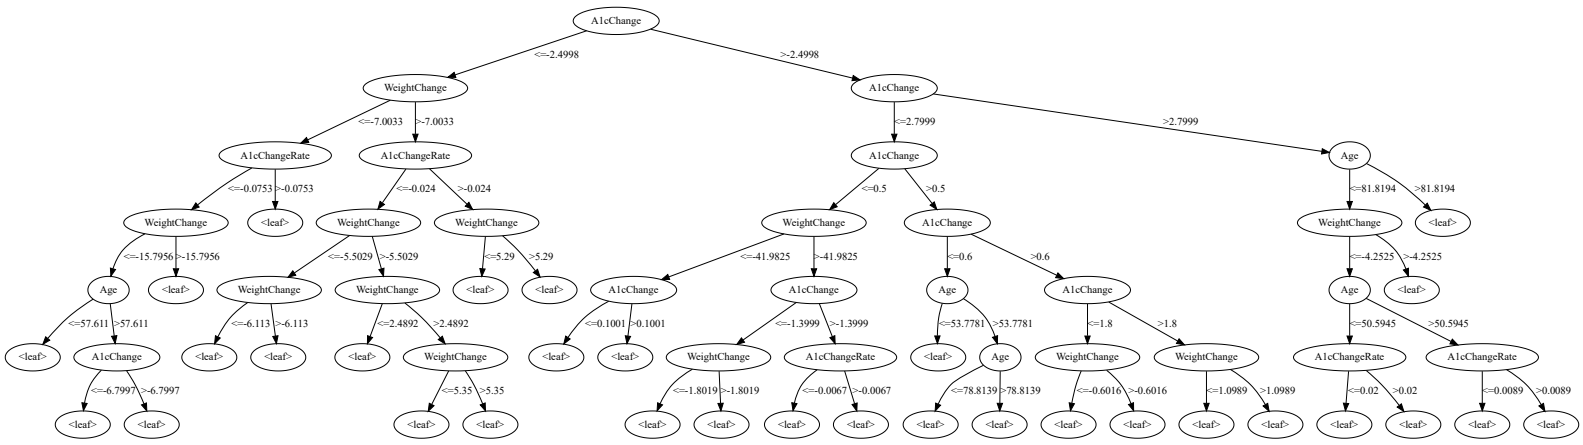

Supplement: NIHMS1791926-supplement-Supplemental_digital_content_7.pdf [file NIHMS1791926-supplement-Supplemental_digital_content_7.pdf]
